# Supplementary material for: Red Upconverter Nanocrystals Functionalized with Verteporfin for Photodynamic Therapy Triggered by Upconversion
Source: MDPI journal article supplement (doi:10.3390/ijms23136951), 2022-06-22
Supplement: s1 [file s1]

## Supporting information

# Red Upconverter Nanocrystals Functionalized with Verteporfin for Photodynamic Therapy Triggered by Upconversion

Ivana Miletto <sup>1,\*</sup>, Chiara Gionco <sup>2,†</sup>, Maria Cristina Paganini <sup>2</sup>, Erik Cerrato <sup>2,†</sup>, Leonardo Marchese <sup>3</sup> and Enrica Gianotti <sup>4,\*</sup>

<sup>1</sup> Dipartimento di Scienze del Farmaco, Università del Piemonte Orientale, Largo Donegani 2/3, 28100 Novara, Italy

<sup>2</sup> Dipartimento di Chimica, Università degli Studi di Torino, Via Pietro Giuria 9, 10125 Torino, Italy; c.gionco@inrim.it (C.G.); mariacristina.paganini@unito.it (M.C.P.); e.cerrato@inrim.it (E.C.)

<sup>3</sup> Dipartimento di Scienze ed Innovazione Tecnologica, Università del Piemonte Orientale, Viale Teresa Michel 11, 15121 Alessandria, Italy; leonardo.marchese@uniupo.it

<sup>4</sup> Dipartimento per la Sostenibilità e la Transizione Ecologica, Università del Piemonte Orientale, Piazza Sant'Eusebio 5, 13100 Vercelli, Italy

\* Correspondence: ivana.miletto@uniupo.it (I.M.); enrica.gianotti@uniupo.it (E.G.)

† Present address: INRiM – Istituto Nazionale di Ricerca Metrologica, Strada delle Cacce 91, 10135 Torino, Italy.

## Content

**Table S1** – Atomic percentage data obtained from EDX analysis of ZEY2, ZEY5 and ZEY10

**Figure S1** – Fluorescence emission spectra obtained by using different excitation wavelength

**Figure S2** – UC spectra obtained by using two different laser powers

**Figure S3** – Predominant Green UC in UC spectra of Er<sup>3+</sup>-doped ZrO<sub>2</sub>

**Figure S4** – DR UV-Vis spectrum of ZEY2-Ver

**Table S1** – Atomic percentage data obtained from EDX analysis of ZEY2, ZEY5 and ZEY10

| <b>Sample</b> | <b>Element line</b> | <b>Weight %</b> | <b>Atomic %</b> | <b>Atomic % on Zr+Er+Yb</b> |
|---------------|---------------------|-----------------|-----------------|-----------------------------|
| <b>ZEY2</b>   | O                   | 25              | 0.66            |                             |
|               | Zr                  | 71.3            | 0.33            | 97.35                       |
|               | Yb                  | 3               | 0.0073          | 2.15                        |
|               | Er                  | 0.7             | 0.0017          | 0.5                         |
|               | total               | 100             | 1               | 100                         |
| <b>ZEY5</b>   | O                   | 25.4            | 0.67            |                             |
|               | Zr                  | 66.1            | 0.31            | 93.63                       |
|               | Yb                  | 7.8             | 0.019           | 5.82                        |
|               | Er                  | 0.7             | 0.0017          | 0.54                        |
|               | total               | 100             | 1               | 100                         |
| <b>ZEY10</b>  | O                   | 20.6            | 0.624           |                             |
|               | Zr                  | 63.8            | 0.3303          | 88.58                       |
|               | Yb                  | 15.0            | 0.044           | 10.97                       |
|               | Er                  | 0.6             | 0.0017          | 0.45                        |
|               | total               | 100             | 1               | 100                         |

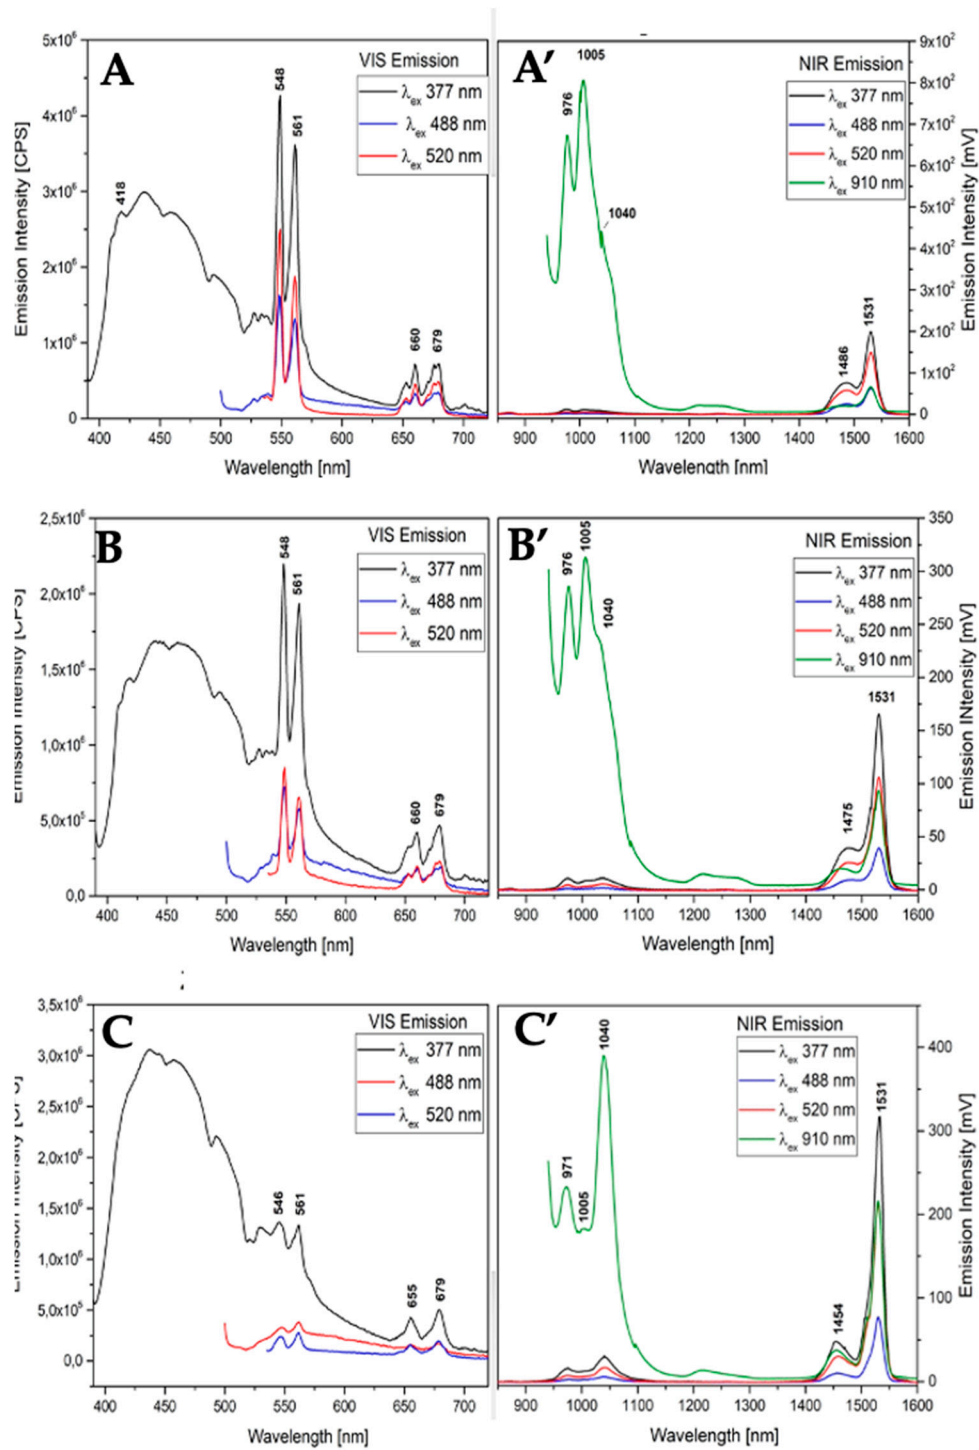

**Figure S1** - Fluorescence emission spectra obtained by using different excitation wavelength: ZEY2 (A, A'); ZEY5 (B, B'), ZEY10 (C, C').

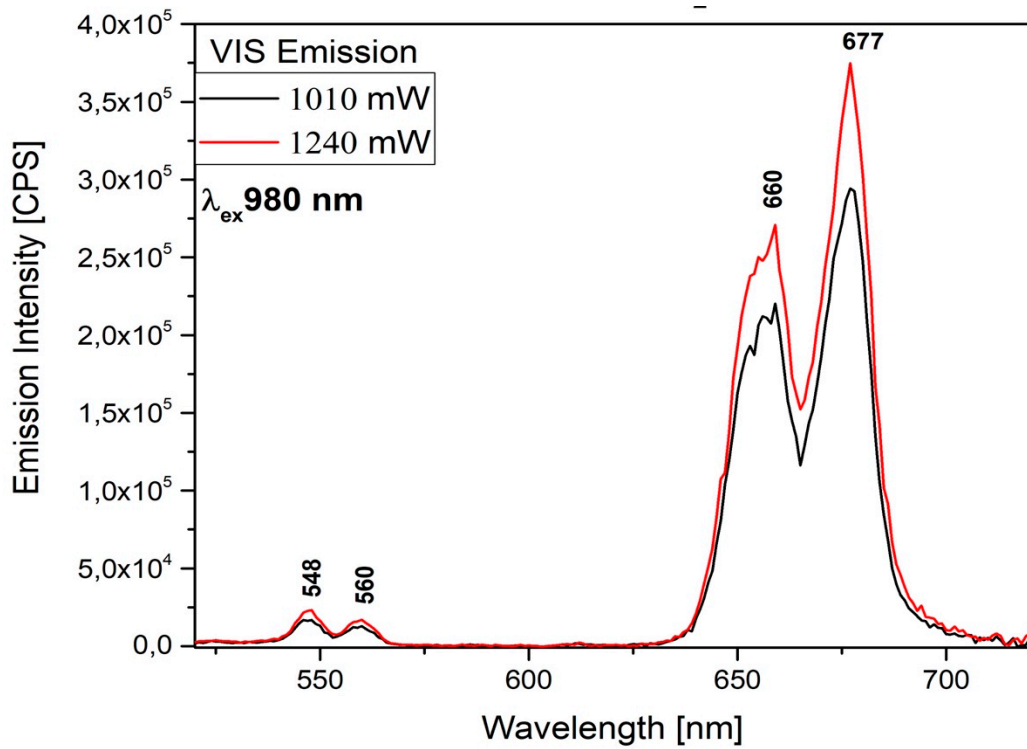

Figure S2 - UC spectra of ZEY2 obtained by using two different laser powers

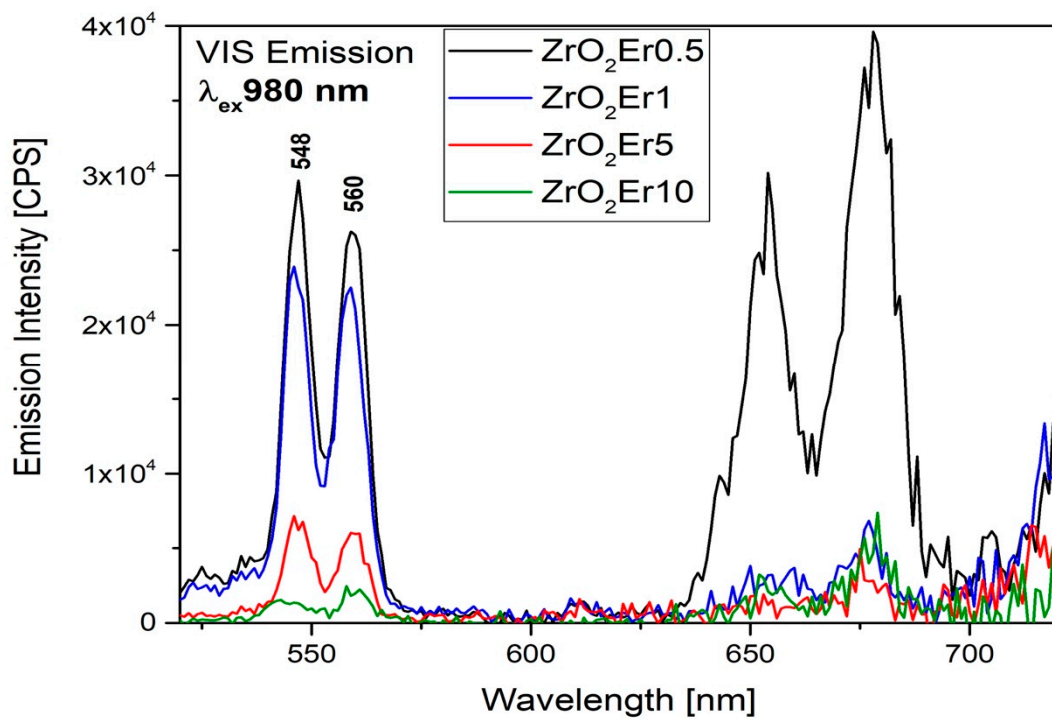

**Figure S3** – Predominant Green UC in UC spectra of Er<sup>3+</sup>-doped ZrO<sub>2</sub>

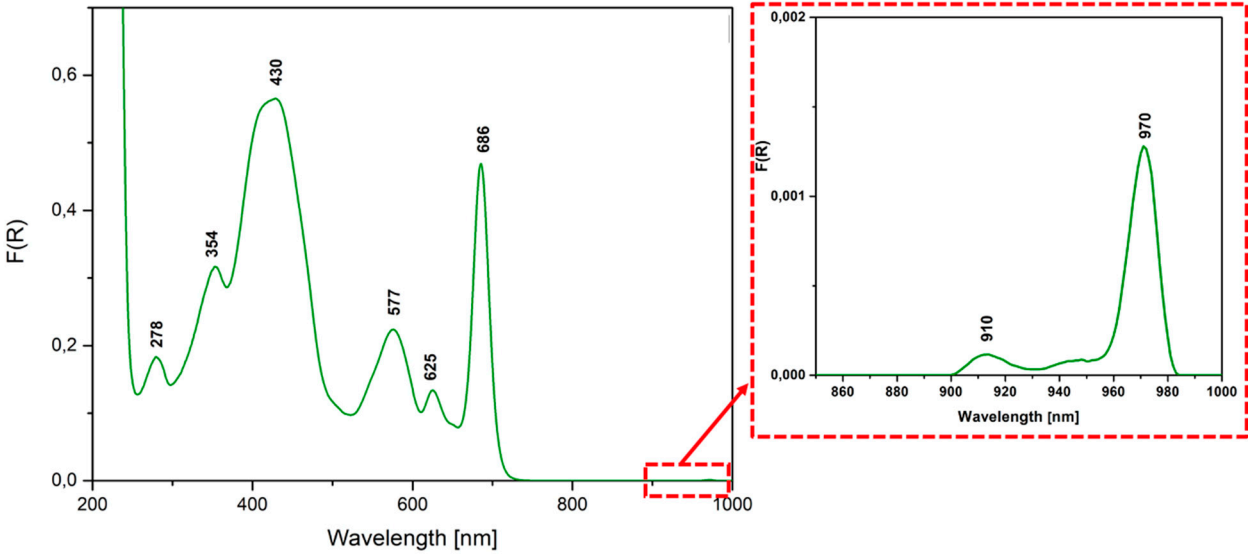

**Figure S4** – DR UV-Vis spectrum of ZEY2-Ver
